# Supplementary material for: Implementing an Ensemble Learning Model with Feature Selection to Predict Mortality among Patients Who Underwent Three-Vessel Percutaneous Coronary Intervention
Source: MDPI journal article supplement (doi:10.3390/app12168135), 2022-08-14
Supplement: s1 [file s1]

**Table S1.** Summary of the model parameter.

| Methods | Meaning of Parameter               | Parameter | Value    |
|---------|------------------------------------|-----------|----------|
| LGR     | Logit function                     | family    | binomial |
| CART    | Complexity parameter               | cp        | 0.081    |
| RF      | Whether random sampling            | Bootstrap | True     |
|         | Number of trees                    | ntree     | 1000     |
| MARS    | The maximum degree of interactions | degree    | 1:2      |
|         | The learning rates.                | Eta       | 0.3      |
| XGBoost | The maximum depth of each tree     | max_depth | 8        |
|         | To control whether post-pruning    | gamma     | 0        |
